# Supplementary material for: The Importance of Spatial Configuration When Restoring Intensive Production Landscapes for Biodiversity and Ecosystem Service Multifunctionality
Source: MDPI journal article supplement (doi:10.3390/land13040460), 2024-04-05
Supplement: s1 [file s1]

## Supplementary Figures and Tables

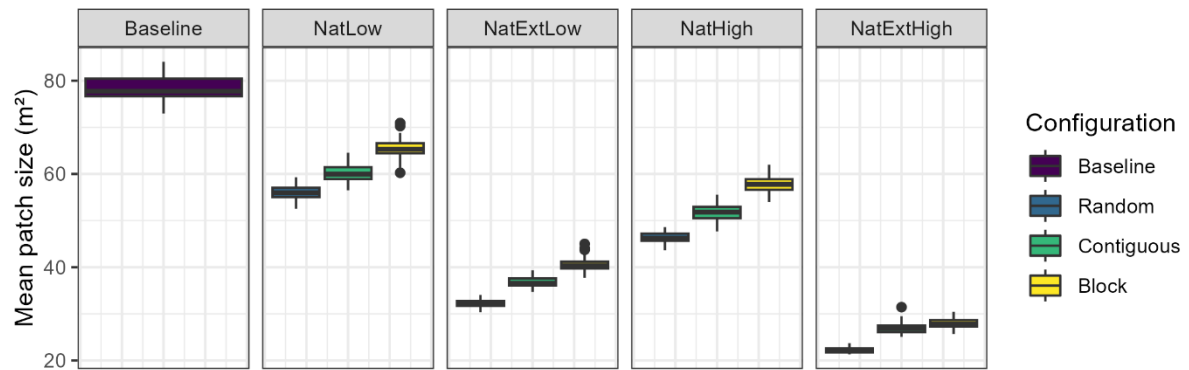

Supplementary Figure 1. Mean patch size for all land cover types across baseline and restoration treatments. Box and whisker plots show the median (bold line), interquartile range (box), and range within  $1.5 \times \text{IQR}$  (whiskers). NatLow = natural restoration low with no extensive grassland, NatHigh = natural restoration high with no extensive grassland, NatExtLow = natural restoration low with additional extensive grassland target, NatExtHigh = natural restoration high with additional extensive grassland target.

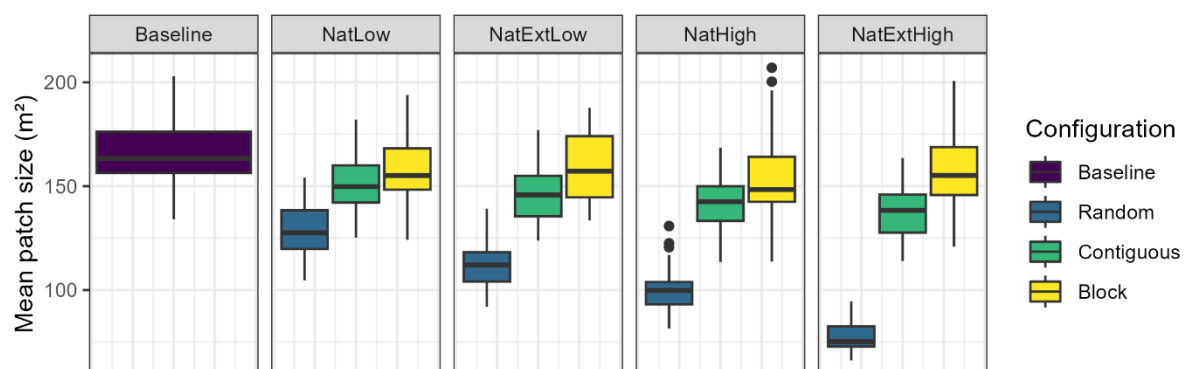

Supplementary Figure 2. Mean patch size for crop/ horticultural land cover across baseline and restoration treatments. Box and whisker plots show the median (bold line), interquartile range (box), and range within  $1.5 \times \text{IQR}$  (whiskers). NatLow = natural restoration low with no extensive grassland, NatHigh = natural restoration high with no extensive grassland, NatExtLow = natural restoration low with additional extensive grassland target, NatExtHigh = natural restoration high with additional extensive grassland target.

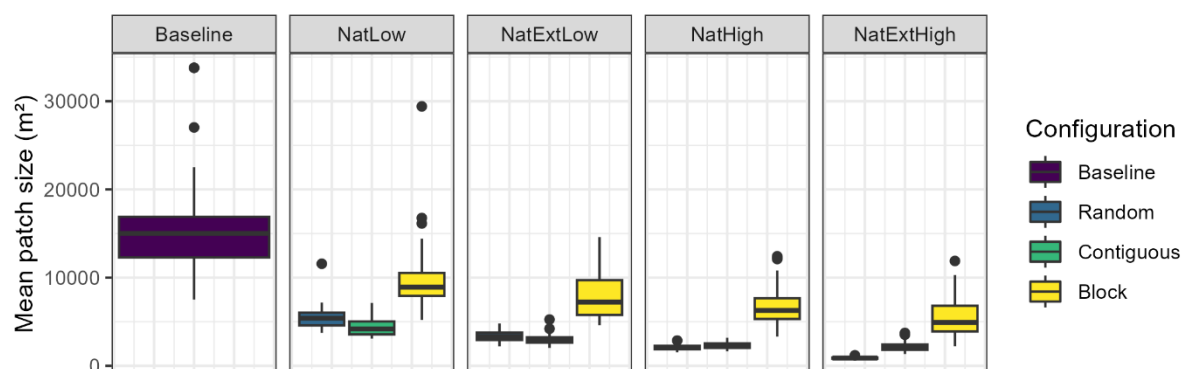

Supplementary Figure 3. Mean patch size for intensive grassland across baseline and restoration treatments. Box and whisker plots show the median (bold line), interquartile range (box), and range within  $1.5 \times \text{IQR}$  (whiskers). NatLow = natural restoration low with no extensive grassland, NatHigh = natural restoration high with no extensive grassland, NatExtLow = natural restoration low with additional extensive grassland target, NatExtHigh = natural restoration high with additional extensive grassland target.

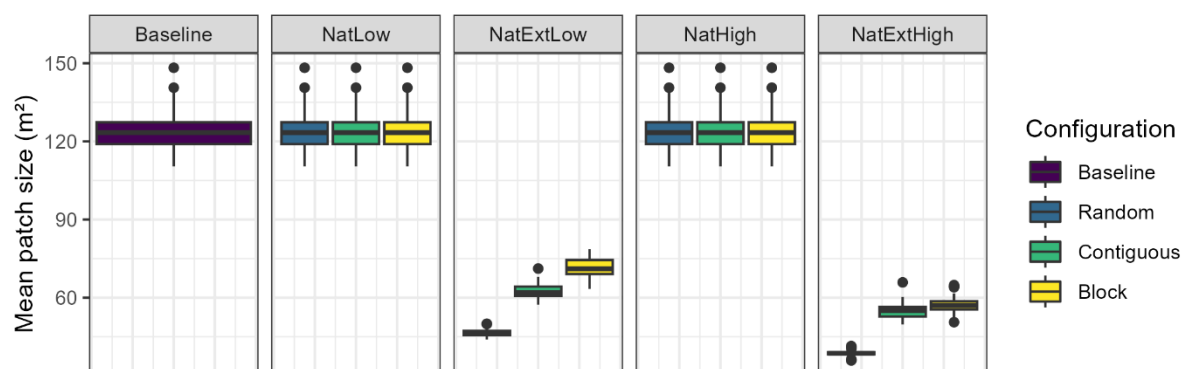

Supplementary Figure 4. Mean patch size for extensive grassland across baseline and restoration treatments. Box and whisker plots show the median (bold line), interquartile range (box), and range within  $1.5 \times \text{IQR}$  (whiskers). NatLow = natural restoration low with no extensive grassland, NatHigh = natural restoration high with no extensive grassland, NatExtLow = natural restoration low with additional extensive grassland target, NatExtHigh = natural restoration high with additional extensive grassland target.

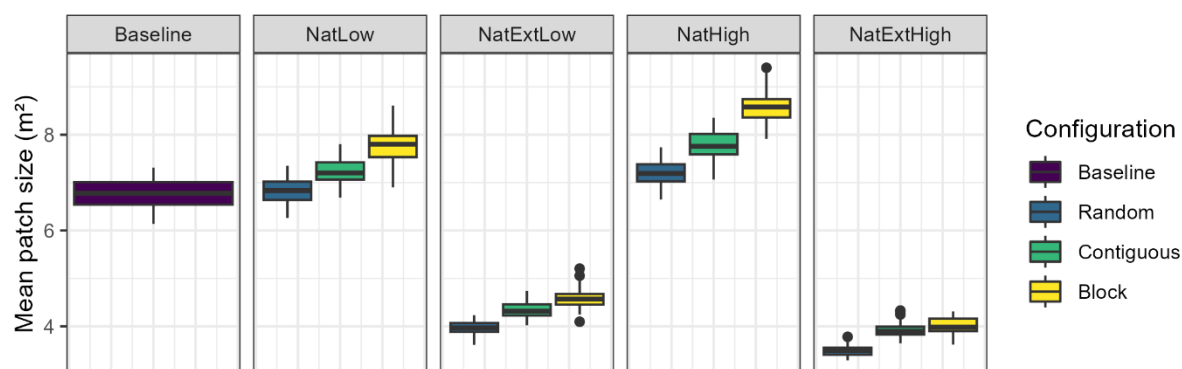

Supplementary Figure 5. Mean patch size scrub across baseline and restoration treatments. Box and whisker plots show the median (bold line), interquartile range (box), and range within  $1.5 \times \text{IQR}$  (whiskers). NatLow = natural restoration low with no extensive grassland, NatHigh = natural restoration high with no extensive grassland, NatExtLow = natural restoration low with additional extensive grassland target, NatExtHigh = natural restoration high with additional extensive grassland target.

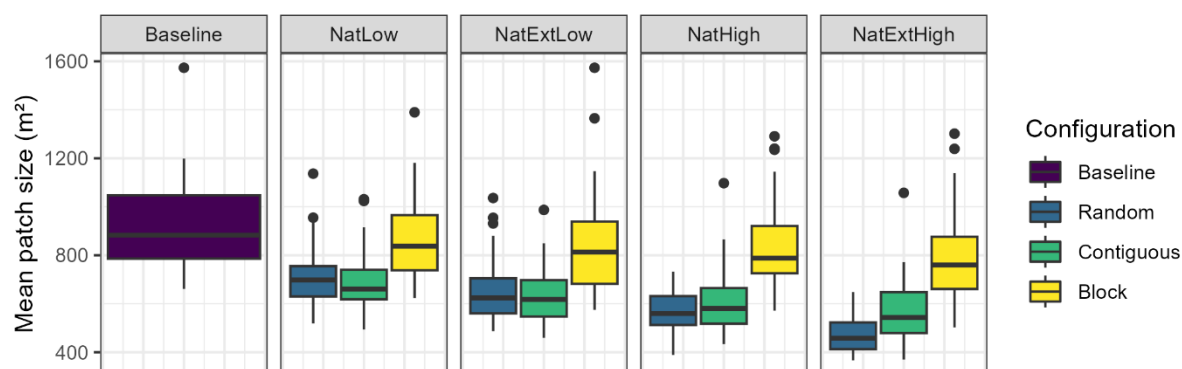

Supplementary Figure 6. Mean patch size for exotic forest across baseline and restoration treatments. Box and whisker plots show the median (bold line), interquartile range (box), and range within  $1.5 \times \text{IQR}$  (whiskers). NatLow = natural restoration low with no extensive grassland, NatHigh = natural restoration high with no extensive grassland, NatExtLow = natural restoration low with additional extensive grassland target, NatExtHigh = natural restoration high with additional extensive grassland target.

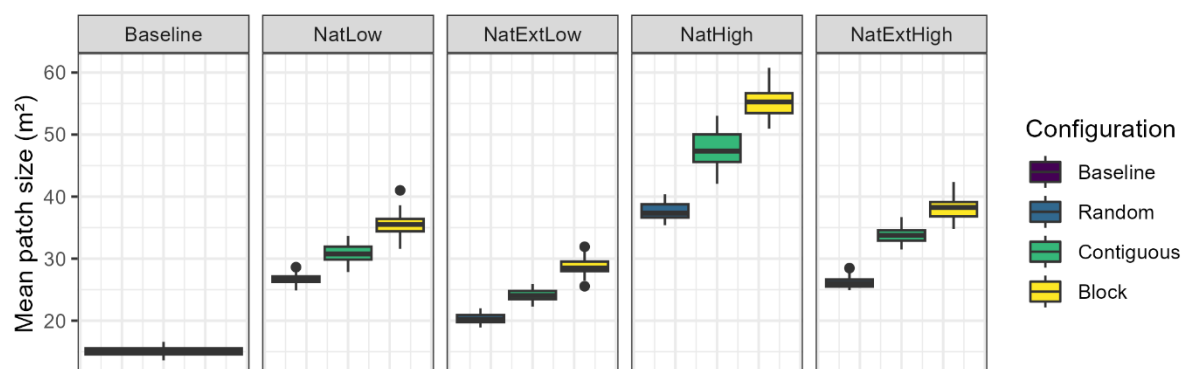

Supplementary Figure 7. Mean patch size natural forest across baseline and restoration treatments. Box and whisker plots show the median (bold line), interquartile range (box), and range within  $1.5 \times \text{IQR}$  (whiskers). NatLow = natural restoration low with no extensive grassland, NatHigh = natural restoration high with no extensive grassland, NatExtLow = natural restoration low with additional extensive grassland target, NatExtHigh = natural restoration high with additional extensive grassland target.

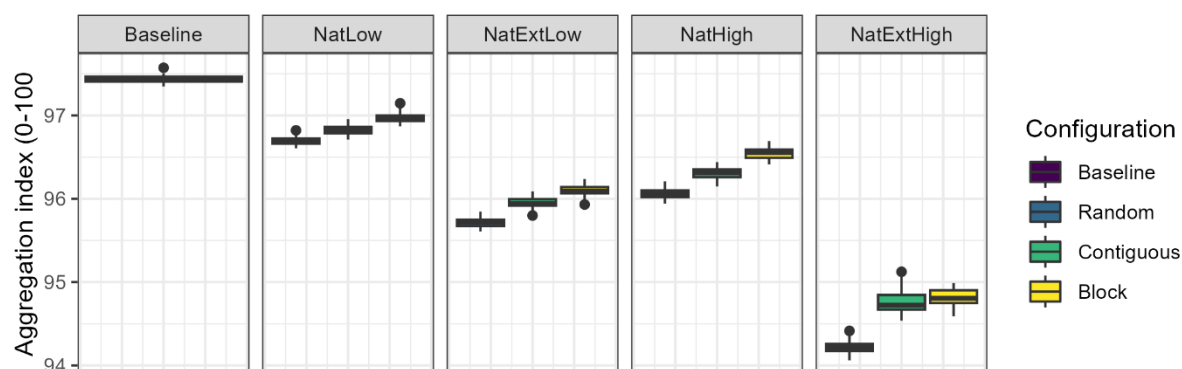

Supplementary Figure 8. Landscape aggregation index across baseline and restoration treatments. Box and whisker plots show the median (bold line), interquartile range (box), and range within  $1.5 \times \text{IQR}$  (whiskers). NatLow = natural restoration low with no extensive grassland, NatHigh = natural restoration high with no extensive grassland, NatExtLow = natural restoration low with additional extensive grassland target, NatExtHigh = natural restoration high with additional extensive grassland target.



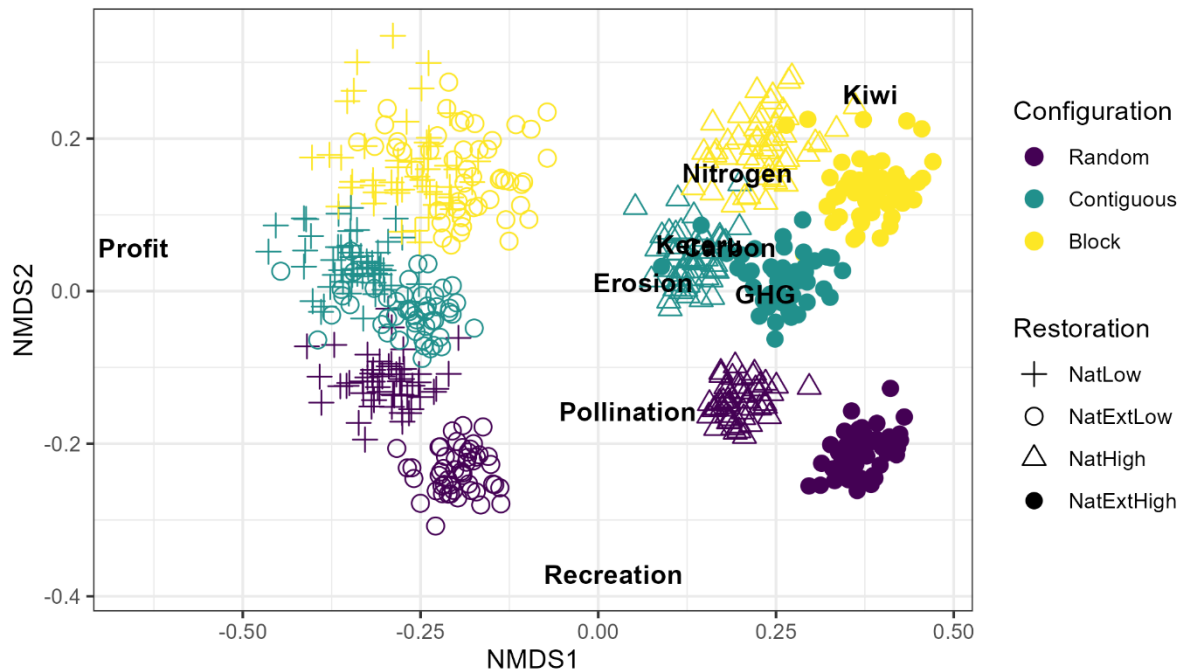

Supplementary Figure 9. Non-metric dimensional scaling of the dissimilarity matrix of scaled landscape performance indicators for all restored landscape realisations only (thus excluding baseline). Bold text indicates variable scores for landscape performance indicators in the dissimilarity space. Points indicate observation scores of each simulated landscape, with treatment groups indicated by colouration and shape. NatLow = natural restoration low with no extensive grassland, NatHigh = natural restoration high with no extensive grassland, NatExtLow = natural restoration low with additional extensive grassland target, NatExtHigh = natural restoration high with additional extensive grassland target.

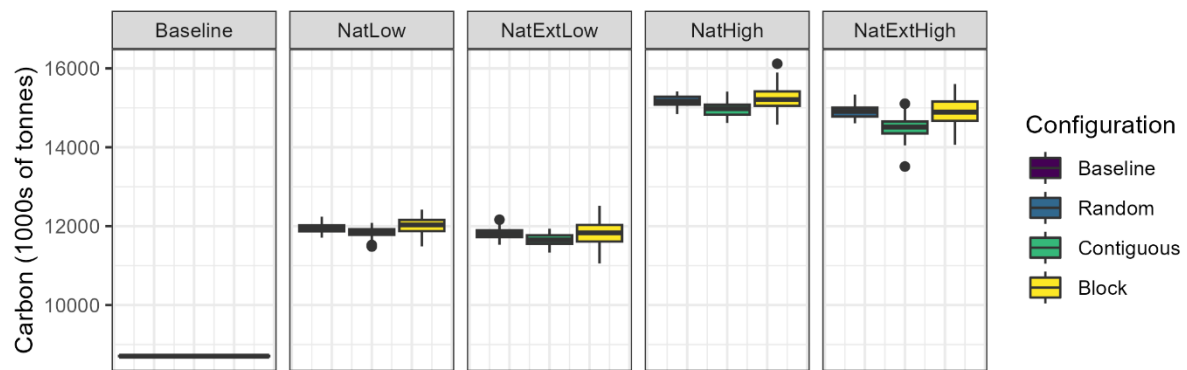

Supplementary Figure 10. Carbon stocks across baseline and restoration treatments. Box and whisker plots show the median (bold line), interquartile range (box), and range within  $1.5 \times$  IQR (whiskers). NatLow = natural restoration low with no extensive grassland, NatHigh = natural restoration high with no extensive grassland, NatExtLow = natural restoration low with additional extensive grassland target, NatExtHigh = natural restoration high with additional extensive grassland target.

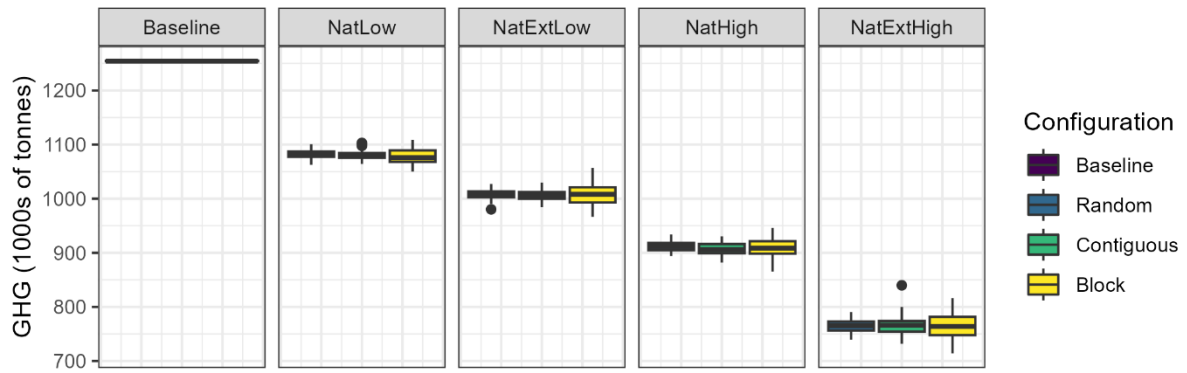

Supplementary Figure 11. Greenhouse gas emissions (GHGs) in CO<sub>2</sub> equivalent across baseline and restoration treatments. Box and whisker plots show the median (bold line), interquartile range (box), and range within 1.5 × IQR (whiskers). NatLow = natural restoration low with no extensive grassland, NatHigh = natural restoration high with no extensive grassland, NatExtLow = natural restoration low with additional extensive grassland target, NatExtHigh = natural restoration high with additional extensive grassland target.

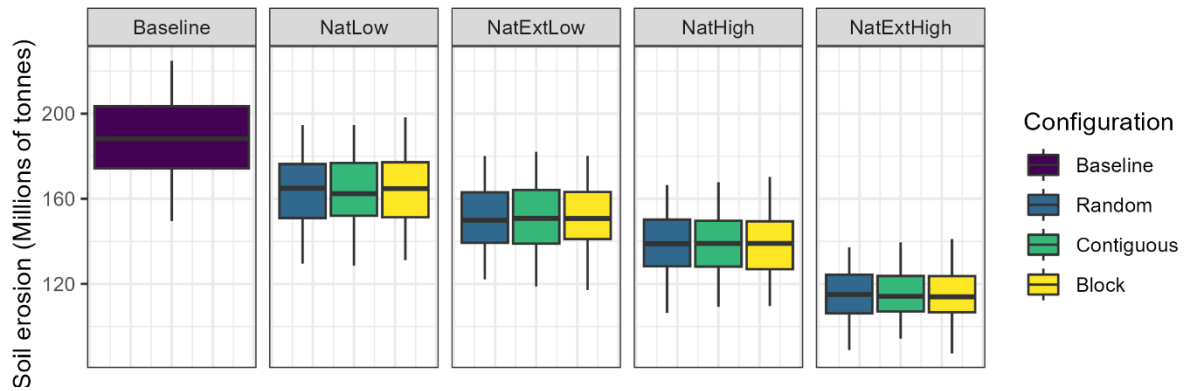

Supplementary Figure 12. Soil lost due to surficial erosion across baseline and restoration treatments. Box and whisker plots show the median (bold line), interquartile range (box), and range within  $1.5 \times \text{IQR}$  (whiskers). NatLow = natural restoration low with no extensive grassland, NatHigh = natural restoration high with no extensive grassland, NatExtLow = natural restoration low with additional extensive grassland target, NatExtHigh = natural restoration high with additional extensive grassland target.

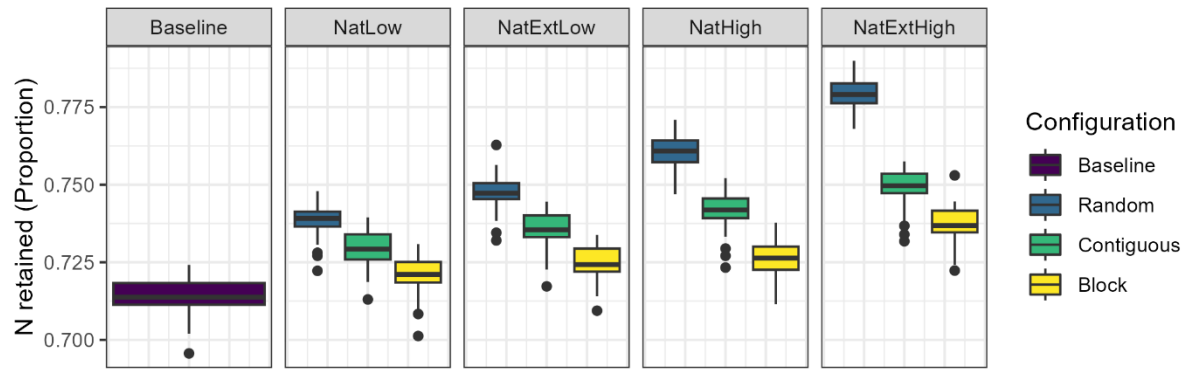

Supplementary Figure 13. Proportion of landscape nitrogen retained across baseline and restoration treatments. Box and whisker plots show the median (bold line), interquartile range (box), and range within  $1.5 \times \text{IQR}$  (whiskers). NatLow = natural restoration low with no extensive grassland, NatHigh = natural restoration high with no extensive grassland, NatExtLow = natural restoration low with additional extensive grassland target, NatExtHigh = natural restoration high with additional extensive grassland target.

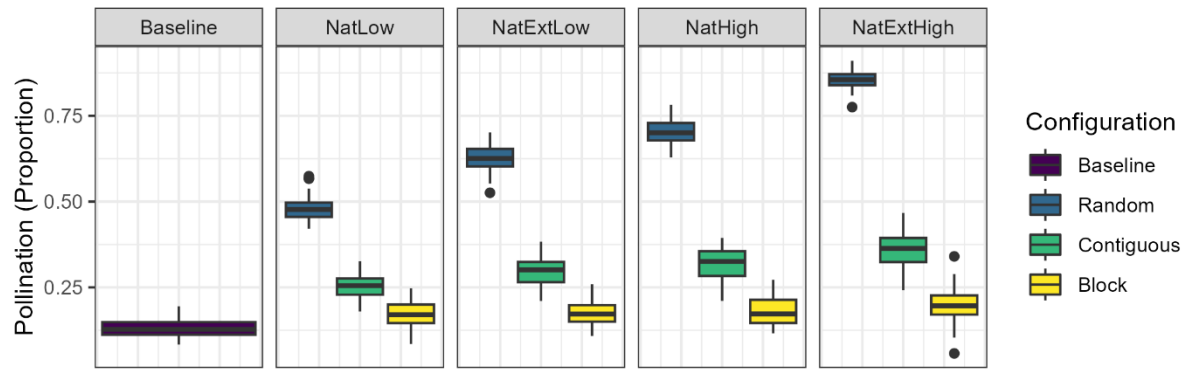

Supplementary Figure 14. Proportion of horticultural land covers receiving pollination services across baseline and restoration treatments. Box and whisker plots show the median (bold line), interquartile range (box), and range within  $1.5 \times \text{IQR}$  (whiskers). NatLow = natural restoration low with no extensive grassland, NatHigh = natural restoration high with no extensive grassland, NatExtLow = natural restoration low with additional extensive grassland target, NatExtHigh = natural restoration high with additional extensive grassland target.

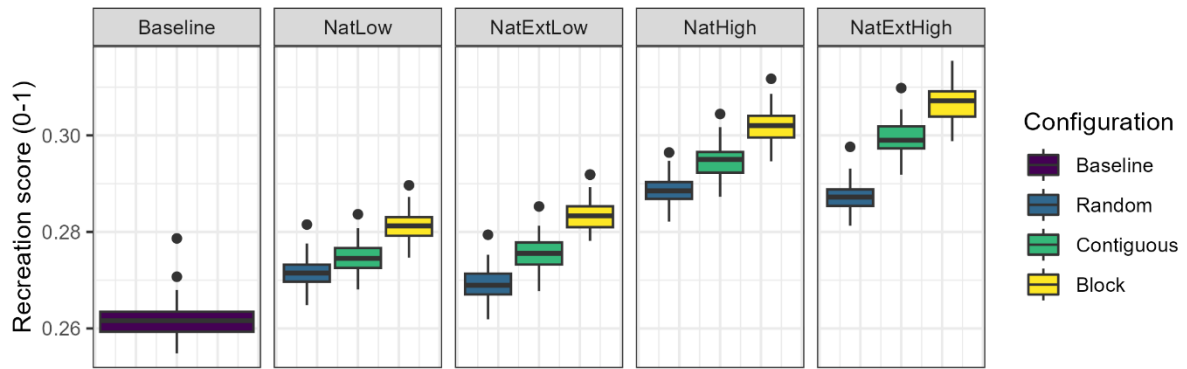

Supplementary Figure 15. Relative recreation score across baseline and restoration treatments. Box and whisker plots show the median (bold line), interquartile range (box), and range within  $1.5 \times \text{IQR}$  (whiskers). NatLow = natural restoration low with no extensive grassland, NatHigh = natural restoration high with no extensive grassland, NatExtLow = natural restoration low with additional extensive grassland target, NatExtHigh = natural restoration high with additional extensive grassland target.

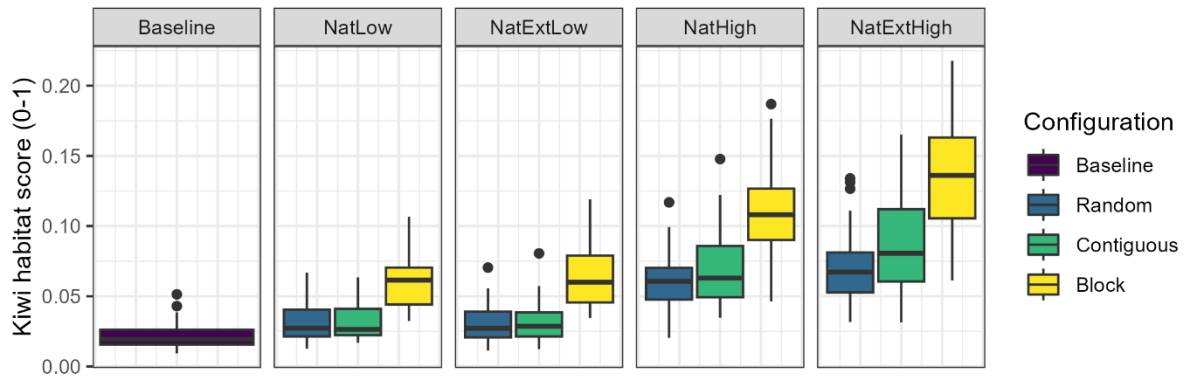

Supplementary Figure 16. Relative habitat suitability for brown kiwi across baseline and restoration treatments. Box and whisker plots show the median (bold line), interquartile range (box), and range within  $1.5 \times \text{IQR}$  (whiskers). NatLow = natural restoration low with no extensive grassland, NatHigh = natural restoration high with no extensive grassland, NatExtLow = natural restoration low with additional extensive grassland target, NatExtHigh = natural restoration high with additional extensive grassland target.



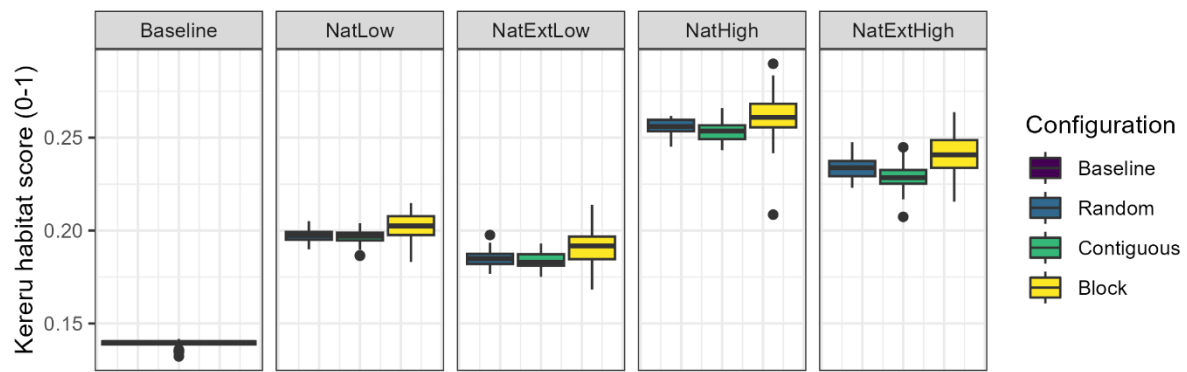

Supplementary Figure 17. Relative habitat suitability for kererū across baseline and restoration treatments. Box and whisker plots show the median (bold line), interquartile range (box), and range within  $1.5 \times \text{IQR}$  (whiskers). NatLow = natural restoration low with no extensive grassland, NatHigh = natural restoration high with no extensive grassland, NatExtLow = natural restoration low with additional extensive grassland target, NatExtHigh = natural restoration high with additional extensive grassland target.

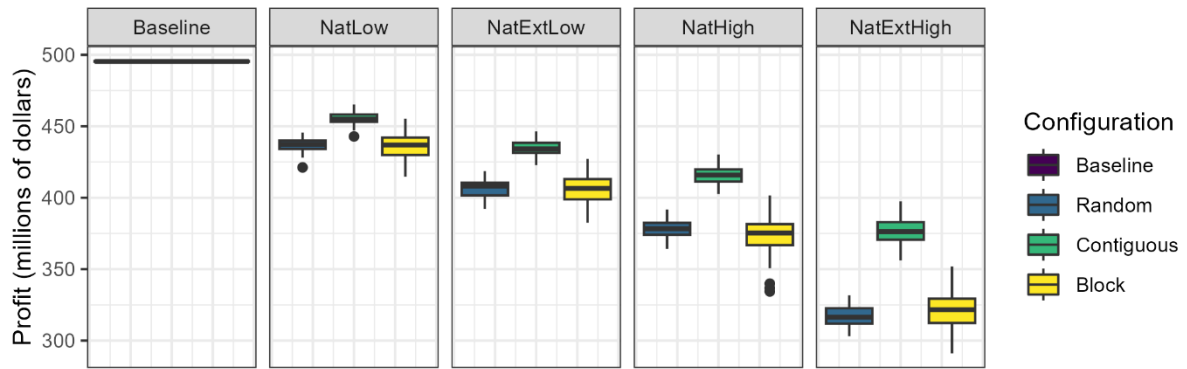

Supplementary Figure 18. Profitability from agricultural production. Box and whisker plots show the median (bold line), interquartile range (box), and range within  $1.5 \times \text{IQR}$  (whiskers). NatLow = natural restoration low with no extensive grassland, NatHigh = natural restoration high with no extensive grassland, NatExtLow = natural restoration low with additional extensive grassland target, NatExtHigh = natural restoration high with additional extensive grassland target.

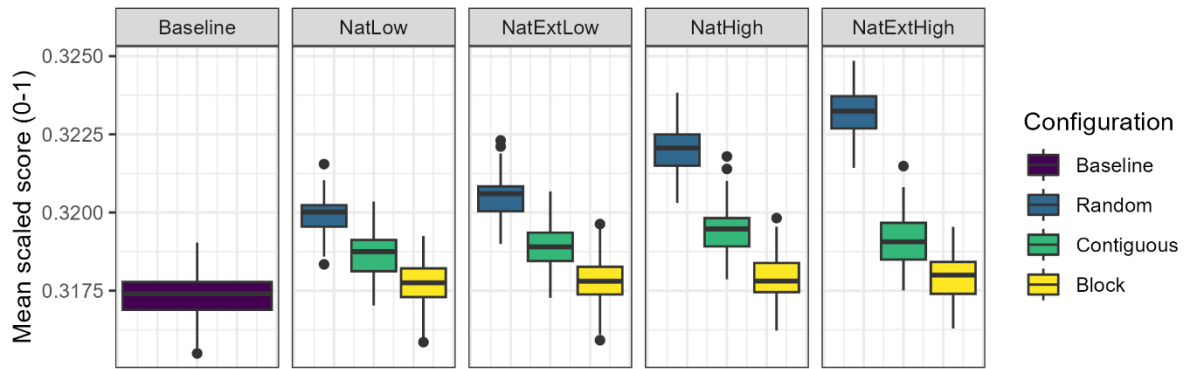

Supplementary Figure 19. Mean multifunctionality in areas of crop cover. Box and whisker plots show the median (bold line), interquartile range (box), and range within  $1.5 \times \text{IQR}$  (whiskers). NatLow = natural restoration low with no extensive grassland, NatHigh = natural restoration high with no extensive grassland, NatExtLow = natural restoration low with additional extensive grassland target, NatExtHigh = natural restoration high with additional extensive grassland target.

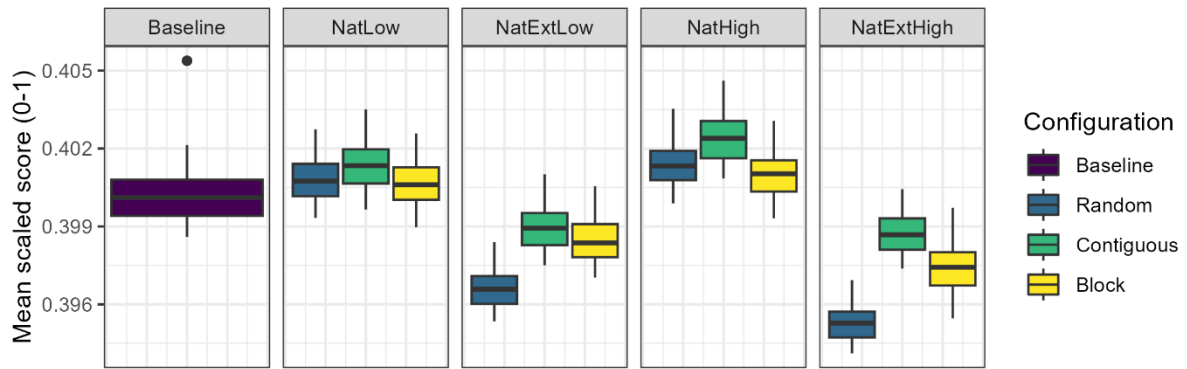

Supplementary Figure 20. Mean multifunctionality in areas of intensive grassland. Box and whisker plots show the median (bold line), interquartile range (box), and range within 1.5 × IQR (whiskers). NatLow = natural restoration low with no extensive grassland, NatHigh = natural restoration high with no extensive grassland, NatExtLow = natural restoration low with additional extensive grassland target, NatExtHigh = natural restoration high with additional extensive grassland target.

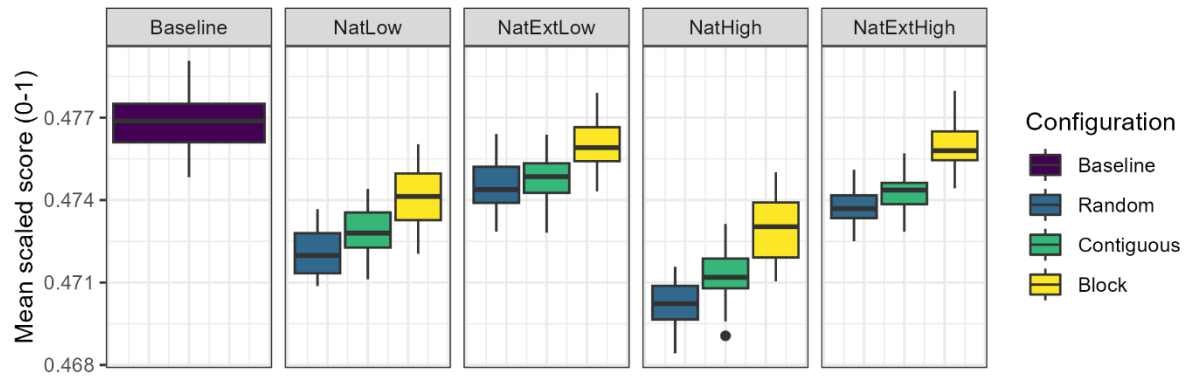

Supplementary Figure 21. Mean multifunctionality in areas of extensive grassland. Box and whisker plots show the median (bold line), interquartile range (box), and range within 1.5 × IQR (whiskers). NatLow = natural restoration low with no extensive grassland, NatHigh = natural restoration high with no extensive grassland, NatExtLow = natural restoration low with additional extensive grassland target, NatExtHigh = natural restoration high with additional extensive grassland target.

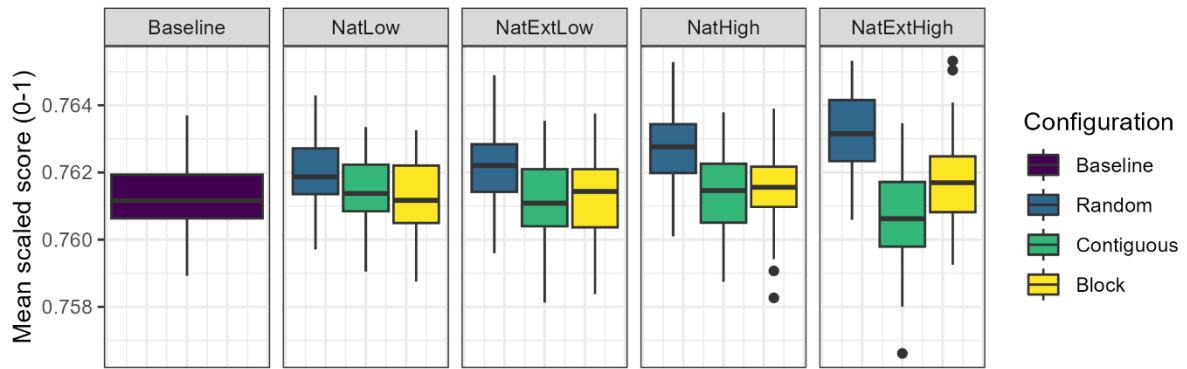

Supplementary Figure 22. Mean multifunctionality in areas of scrub. Box and whisker plots show the median (bold line), interquartile range (box), and range within  $1.5 \times \text{IQR}$  (whiskers). NatLow = natural restoration low with no extensive grassland, NatHigh = natural restoration high with no extensive grassland, NatExtLow = natural restoration low with additional extensive grassland target, NatExtHigh = natural restoration high with additional extensive grassland target.

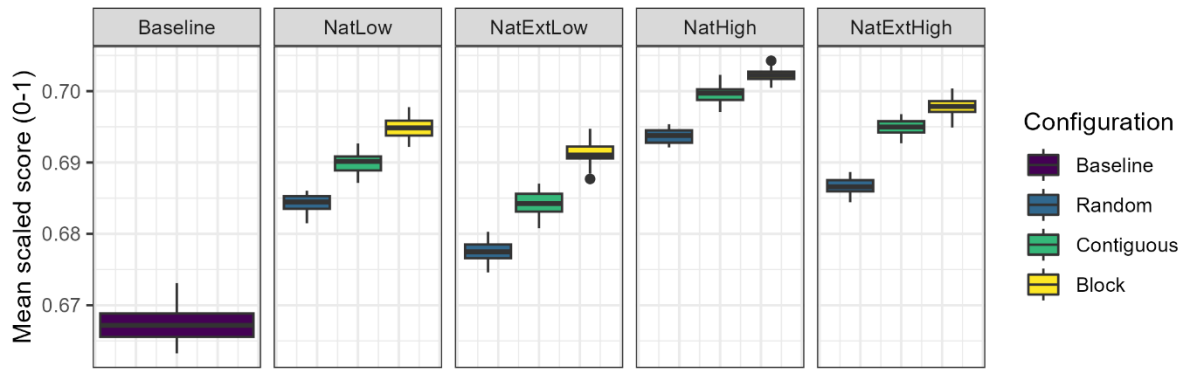

Supplementary Figure 23. Mean multifunctionality in areas of exotic forest. Box and whisker plots show the median (bold line), interquartile range (box), and range within  $1.5 \times \text{IQR}$  (whiskers). NatLow = natural restoration low with no extensive grassland, NatHigh = natural restoration high with no extensive grassland, NatExtLow = natural restoration low with additional extensive grassland target, NatExtHigh = natural restoration high with additional extensive grassland target.

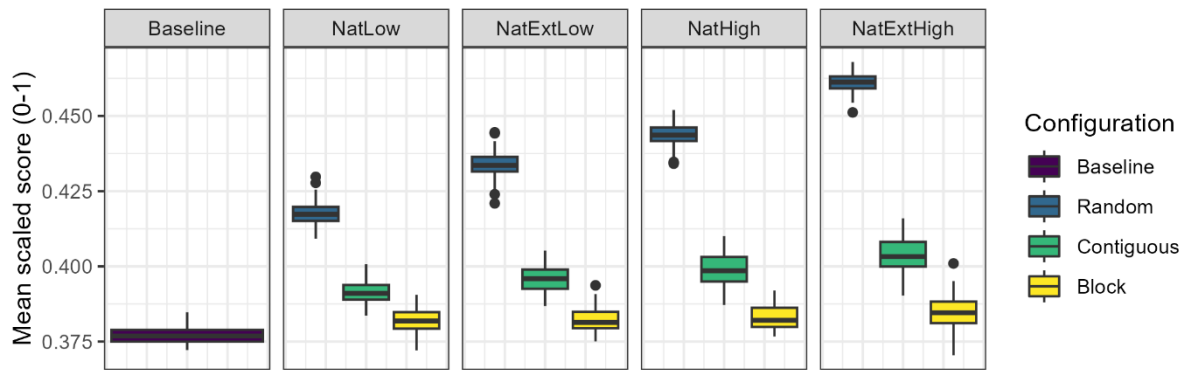

Supplementary Figure 24. Mean multifunctionality in areas of natural forest. Box and whisker plots show the median (bold line), interquartile range (box), and range within  $1.5 \times \text{IQR}$  (whiskers). NatLow = natural restoration low with no extensive grassland, NatHigh = natural restoration high with no extensive grassland, NatExtLow = natural restoration low with additional extensive grassland target, NatExtHigh = natural restoration high with additional extensive grassland target.



Supplementary Table 1. Model parameters for landscape performance indicators

| Parameter           | Carbon stock (t/ha) | GHG emissions (kg e-CO <sub>2</sub> ha yr) | Vegetation factor for erosion model | Nitrogen load (kg/ ha) | Nitrogen retention efficiency (proportion) | Pollinator habitat suitability | Relative attractiveness index | Kiwi or kererū habitat suitability | Profit per hectare |
|---------------------|---------------------|--------------------------------------------|-------------------------------------|------------------------|--------------------------------------------|--------------------------------|-------------------------------|------------------------------------|--------------------|
| Horticulture        | 5                   | 1000                                       | 0.5                                 | 45                     | 0.4                                        | No                             | 0                             | No                                 | 17697              |
| Intensive grassland | 10                  | 8800                                       | 0.1                                 | 65                     | 0.4                                        | No                             | 0.2                           | No                                 | 1300               |
| Extensive grassland | 18                  | 1000                                       | 0.01                                | 10                     | 0.6                                        | Yes                            | 0.7                           | No                                 | 250                |
| Scrub               | 30                  | 5                                          | 0.005                               | 4                      | 0.8                                        | Yes                            | 0.6                           | No                                 | 1300               |
| Exotic forest       | 140                 | 5                                          | 0.007                               | 10                     | 0.7                                        | Yes                            | 0.5                           | Yes                                | 1000               |
| Natural forest      | 200                 | 3                                          | 0.005                               | 2                      | 0.85                                       | Yes                            | 1                             | Yes                                | 0                  |

Supplementary Table 2. Landscape pattern indicators modelled in response to restoration treatments.

|                                | <i>Dependent variable:</i> |                            |                                          |                                          |                            |                                    |                                     |                     |
|--------------------------------|----------------------------|----------------------------|------------------------------------------|------------------------------------------|----------------------------|------------------------------------|-------------------------------------|---------------------|
|                                | Landscape mean patch area  | Crops<br>(mean patch area) | Intensive grassland<br>(mean patch area) | Extensive grassland<br>(mean patch area) | Scrub<br>(mean patch area) | Exotic forest<br>(mean patch area) | Natural forest<br>(mean patch area) | Aggregation         |
| Contiguous                     | -1.875***<br>-0.179        | -18.589***<br>-1.43        | -3,580.512***<br>-272.549                | -3.779***<br>-0.633                      | -0.208***<br>-0.029        | -234.868***<br>-15.123             | -5.042***<br>-0.202                 | -0.104***<br>-0.008 |
| Random                         | -6.889***<br>-0.179        | -77.540***<br>-1.43        | -4,773.411***<br>-272.549                | -20.064***<br>-0.633                     | -0.671***<br>-0.029        | -314.696***<br>-15.123             | -13.237***<br>-0.202                | -0.591***<br>-0.008 |
| No extensive grassland         | 28.538***<br>-0.169        | -1.356<br>-1.349           | 999.892***<br>-256.962                   | 64.874***<br>-0.597                      | 4.409***<br>-0.027         | 51.063***<br>-14.259               | 15.750***<br>-0.19                  | 1.702***<br>-0.008  |
| Low restoration                | 11.261***<br>-0.169        | 3.835***<br>-1.349         | 2,221.557***<br>-256.962                 | 11.960***<br>-0.597                      | 0.404***<br>-0.027         | 47.460***<br>-14.259               | -10.842***<br>-0.19                 | 1.255***<br>-0.008  |
| Contiguous : No extensive      | -3.311***<br>-0.207        | 6.575***<br>-1.652         | -748.853**<br>-314.713                   | 5.482***<br>-0.731                       | -0.489***<br>-0.033        | 7.841<br>-17.463                   | -1.750***<br>-0.233                 | -0.090***<br>-0.01  |
| Random : No extensive          | -3.405***<br>-0.207        | 20.901***<br>-1.652        | 163.056<br>-314.713                      | 21.619***<br>-0.731                      | -0.583***<br>-0.033        | 35.263**<br>-17.463                | -3.021***<br>-0.233                 | 0.106***<br>-0.01   |
| Contiguous : Low restoration   | -0.996***<br>-0.207        | 5.361***<br>-1.652         | -1,229.200***<br>-314.713                | -3.405***<br>-0.731                      | 0.056*<br>-0.033           | 38.517**<br>-17.463                | 1.336***<br>-0.233                  | -0.003<br>-0.01     |
| Random : Low restoration       | -0.301<br>-0.207           | 28.502***<br>-1.652        | 230.369<br>-314.713                      | -3.110***<br>-0.731                      | 0.202***<br>-0.033         | 120.251***<br>-17.463              | 6.173***<br>-0.233                  | 0.209***<br>-0.01   |
| No extensive : Low restoration | -2.261***<br>-0.169        | -0.96<br>-1.349            | 934.313***<br>-256.962                   | -9.788***<br>-0.597                      | -1.061***<br>-0.027        | -20.141<br>-14.259                 | -7.482***<br>-0.19                  | -0.800***<br>-0.008 |
| Constant                       | 28.627***<br>-0.205        | 156.320***<br>-1.944       | 5,679.993***<br>-226.074                 | 58.201***<br>-0.765                      | 4.095***<br>-0.033         | 793.126***<br>-18.887              | 38.804***<br>-0.222                 | 94.829***<br>-0.01  |
| Observations                   | 600                        | 600                        | 600                                      | 600                                      | 600                        | 600                                | 600                                 | 600                 |
| Log Likelihood                 | -944.835                   | -2,182.381                 | -5,231.589                               | -1,693.165                               | 130.459                    | -3,567.924                         | -1,011.514                          | 861.273             |
| Akaike Inf. Crit.              | 1,913.671                  | 4,388.761                  | 10,487.180                               | 3,410.330                                | -236.917                   | 7,159.847                          | 2,047.029                           | -1,698.545          |
| Bayesian Inf. Crit.            | 1,966.434                  | 4,441.525                  | 10,539.940                               | 3,463.094                                | -184.154                   | 7,212.611                          | 2,099.792                           | -1,645.782          |

Note:

\*p<0.1; \*\*p<0.05; \*\*\*p<0.01

Supplementary Table 3. Pairwise permutational analysis of variance differences in indicator similarity between all treatment combinations.

| Comparison                                | Df | Sum of squares | F       | R2   | p       | Adjusted<br>p |
|-------------------------------------------|----|----------------|---------|------|---------|---------------|
| NatLowContiguous vs NatLowRandom          | 1  | 0.22           | 95.27   | 0.49 | < 0.001 | < 0.01        |
| NatLowContiguous vs NatLowBlock           | 1  | 0.21           | 61.54   | 0.39 | < 0.001 | < 0.01        |
| NatLowContiguous vs NatHighContiguous     | 1  | 1.57           | 751.74  | 0.88 | < 0.001 | < 0.01        |
| NatLowContiguous vs NatHighRandom         | 1  | 2.60           | 1430.34 | 0.94 | < 0.001 | < 0.01        |
| NatLowContiguous vs NatHighBlock          | 1  | 2.56           | 962.04  | 0.91 | < 0.001 | < 0.01        |
| NatLowContiguous vs NatExtLowContiguous   | 1  | 0.20           | 77.81   | 0.44 | < 0.001 | < 0.01        |
| NatLowContiguous vs NatExtLowRandom       | 1  | 0.84           | 371.19  | 0.79 | < 0.001 | < 0.01        |
| NatLowContiguous vs NatExtLowBlock        | 1  | 0.47           | 131.10  | 0.57 | < 0.001 | < 0.01        |
| NatLowContiguous vs NatExtHighContiguous  | 1  | 2.52           | 1112.60 | 0.92 | < 0.001 | < 0.01        |
| NatLowContiguous vs NatExtHighRandom      | 1  | 4.22           | 2374.46 | 0.96 | < 0.001 | < 0.01        |
| NatLowContiguous vs NatExtHighBlock       | 1  | 3.71           | 1338.54 | 0.93 | < 0.001 | < 0.01        |
| NatLowContiguous vs Baseline              | 1  | 3.95           | 810.59  | 0.89 | < 0.001 | < 0.01        |
| NatLowRandom vs NatLowBlock               | 1  | 0.52           | 163.72  | 0.63 | < 0.001 | < 0.01        |
| NatLowRandom vs NatHighContiguous         | 1  | 1.46           | 767.70  | 0.89 | < 0.001 | < 0.01        |
| NatLowRandom vs NatHighRandom             | 1  | 1.80           | 1099.98 | 0.92 | < 0.001 | < 0.01        |
| NatLowRandom vs NatHighBlock              | 1  | 2.93           | 1184.07 | 0.92 | < 0.001 | < 0.01        |
| NatLowRandom vs NatExtLowContiguous       | 1  | 0.27           | 113.61  | 0.54 | < 0.001 | < 0.01        |
| NatLowRandom vs NatExtLowRandom           | 1  | 0.31           | 146.99  | 0.60 | < 0.001 | < 0.01        |
| NatLowRandom vs NatExtLowBlock            | 1  | 0.81           | 238.83  | 0.71 | < 0.001 | < 0.01        |
| NatLowRandom vs NatExtHighContiguous      | 1  | 2.17           | 1041.28 | 0.91 | < 0.001 | < 0.01        |
| NatLowRandom vs NatExtHighRandom          | 1  | 3.19           | 1995.09 | 0.95 | < 0.001 | < 0.01        |
| NatLowRandom vs NatExtHighBlock           | 1  | 3.87           | 1494.44 | 0.94 | < 0.001 | < 0.01        |
| NatLowRandom vs Baseline                  | 1  | 5.27           | 1122.20 | 0.92 | < 0.001 | < 0.01        |
| NatLowBlock vs NatHighContiguous          | 1  | 1.31           | 445.47  | 0.82 | < 0.001 | < 0.01        |
| NatLowBlock vs NatHighRandom              | 1  | 2.35           | 878.60  | 0.90 | < 0.001 | < 0.01        |
| NatLowBlock vs NatHighBlock               | 1  | 1.75           | 497.35  | 0.84 | < 0.001 | < 0.01        |
| NatLowBlock vs NatExtLowContiguous        | 1  | 0.43           | 125.20  | 0.56 | < 0.001 | < 0.01        |
| NatLowBlock vs NatExtLowRandom            | 1  | 1.29           | 411.32  | 0.81 | < 0.001 | < 0.01        |
| NatLowBlock vs NatExtLowBlock             | 1  | 0.18           | 40.98   | 0.29 | < 0.001 | < 0.01        |
| NatLowBlock vs NatExtHighContiguous       | 1  | 2.15           | 690.60  | 0.88 | < 0.001 | < 0.01        |
| NatLowBlock vs NatExtHighRandom           | 1  | 3.87           | 1465.28 | 0.94 | < 0.001 | < 0.01        |
| NatLowBlock vs NatExtHighBlock            | 1  | 2.93           | 807.87  | 0.89 | < 0.001 | < 0.01        |
| NatLowBlock vs Baseline                   | 1  | 4.81           | 838.50  | 0.90 | < 0.001 | < 0.01        |
| NatHighContiguous vs NatHighRandom        | 1  | 0.29           | 209.15  | 0.68 | < 0.001 | < 0.01        |
| NatHighContiguous vs NatHighBlock         | 1  | 0.23           | 103.26  | 0.51 | < 0.001 | < 0.01        |
| NatHighContiguous vs NatExtLowContiguous  | 1  | 1.15           | 535.21  | 0.85 | < 0.001 | < 0.01        |
| NatHighContiguous vs NatExtLowRandom      | 1  | 1.51           | 816.60  | 0.89 | < 0.001 | < 0.01        |
| NatHighContiguous vs NatExtLowBlock       | 1  | 1.03           | 326.81  | 0.77 | < 0.001 | < 0.01        |
| NatHighContiguous vs NatExtHighContiguous | 1  | 0.28           | 153.00  | 0.61 | < 0.001 | < 0.01        |
| NatHighContiguous vs NatExtHighRandom     | 1  | 1.07           | 790.21  | 0.89 | < 0.001 | < 0.01        |
| NatHighContiguous vs NatExtHighBlock      | 1  | 0.61           | 261.18  | 0.73 | < 0.001 | < 0.01        |
| NatHighContiguous vs Baseline             | 1  | 9.04           | 2027.25 | 0.95 | < 0.001 | < 0.01        |
| NatHighRandom vs NatHighBlock             | 1  | 0.61           | 308.64  | 0.76 | < 0.001 | < 0.01        |

|                                             |   |       |         |      |         |        |
|---------------------------------------------|---|-------|---------|------|---------|--------|
| NatHighRandom vs NatExtLowContiguous        | 1 | 2.00  | 1066.69 | 0.92 | < 0.001 | < 0.01 |
| NatHighRandom vs NatExtLowRandom            | 1 | 1.13  | 719.32  | 0.88 | < 0.001 | < 0.01 |
| NatHighRandom vs NatExtLowBlock             | 1 | 1.83  | 635.94  | 0.87 | < 0.001 | < 0.01 |
| NatHighRandom vs NatExtHighContiguous       | 1 | 0.48  | 307.21  | 0.76 | < 0.001 | < 0.01 |
| NatHighRandom vs NatExtHighRandom           | 1 | 0.38  | 350.57  | 0.78 | < 0.001 | < 0.01 |
| NatHighRandom vs NatExtHighBlock            | 1 | 1.09  | 526.34  | 0.84 | < 0.001 | < 0.01 |
| NatHighRandom vs Baseline                   | 1 | 11.28 | 2696.32 | 0.96 | < 0.001 | < 0.01 |
| NatHighBlock vs NatExtLowContiguous         | 1 | 2.26  | 832.62  | 0.89 | < 0.001 | < 0.01 |
| NatHighBlock vs NatExtLowRandom             | 1 | 2.92  | 1208.19 | 0.92 | < 0.001 | < 0.01 |
| NatHighBlock vs NatExtLowBlock              | 1 | 1.30  | 350.89  | 0.78 | < 0.001 | < 0.01 |
| NatHighBlock vs NatExtHighContiguous        | 1 | 0.43  | 178.39  | 0.65 | < 0.001 | < 0.01 |
| NatHighBlock vs NatExtHighRandom            | 1 | 1.51  | 785.14  | 0.89 | < 0.001 | < 0.01 |
| NatHighBlock vs NatExtHighBlock             | 1 | 0.32  | 109.11  | 0.53 | < 0.001 | < 0.01 |
| NatHighBlock vs Baseline                    | 1 | 10.77 | 2141.81 | 0.96 | < 0.001 | < 0.01 |
| NatExtLowContiguous vs NatExtLowRandom      | 1 | 0.40  | 170.35  | 0.63 | < 0.001 | < 0.01 |
| NatExtLowContiguous vs NatExtLowBlock       | 1 | 0.32  | 87.39   | 0.47 | < 0.001 | < 0.01 |
| NatExtLowContiguous vs NatExtHighContiguous | 1 | 1.90  | 818.63  | 0.89 | < 0.001 | < 0.01 |
| NatExtLowContiguous vs NatExtHighRandom     | 1 | 3.40  | 1850.05 | 0.95 | < 0.001 | < 0.01 |
| NatExtLowContiguous vs NatExtHighBlock      | 1 | 3.14  | 1109.52 | 0.92 | < 0.001 | < 0.01 |
| NatExtLowContiguous vs Baseline             | 1 | 5.04  | 1020.91 | 0.91 | < 0.001 | < 0.01 |
| NatExtLowRandom vs NatExtLowBlock           | 1 | 0.86  | 258.79  | 0.73 | < 0.001 | < 0.01 |
| NatExtLowRandom vs NatExtHighContiguous     | 1 | 1.90  | 939.72  | 0.91 | < 0.001 | < 0.01 |
| NatExtLowRandom vs NatExtHighRandom         | 1 | 2.23  | 1452.82 | 0.94 | < 0.001 | < 0.01 |
| NatExtLowRandom vs NatExtHighBlock          | 1 | 3.69  | 1459.27 | 0.94 | < 0.001 | < 0.01 |
| NatExtLowRandom vs Baseline                 | 1 | 6.99  | 1508.35 | 0.94 | < 0.001 | < 0.01 |
| NatExtLowBlock vs NatExtHighContiguous      | 1 | 1.60  | 483.22  | 0.83 | < 0.001 | < 0.01 |
| NatExtLowBlock vs NatExtHighRandom          | 1 | 3.17  | 1116.11 | 0.92 | < 0.001 | < 0.01 |
| NatExtLowBlock vs NatExtHighBlock           | 1 | 2.28  | 594.56  | 0.86 | < 0.001 | < 0.01 |
| NatExtLowBlock vs Baseline                  | 1 | 6.07  | 1023.23 | 0.91 | < 0.001 | < 0.01 |
| NatExtHighContiguous vs NatExtHighRandom    | 1 | 0.55  | 361.62  | 0.79 | < 0.001 | < 0.01 |
| NatExtHighContiguous vs NatExtHighBlock     | 1 | 0.24  | 96.12   | 0.50 | < 0.001 | < 0.01 |
| NatExtHighContiguous vs Baseline            | 1 | 11.26 | 2431.39 | 0.96 | < 0.001 | < 0.01 |
| NatExtHighRandom vs NatExtHighBlock         | 1 | 0.83  | 407.86  | 0.81 | < 0.001 | < 0.01 |
| NatExtHighRandom vs Baseline                | 1 | 14.63 | 3527.01 | 0.97 | < 0.001 | < 0.01 |
| NatExtHighBlock vs Baseline                 | 1 | 13.75 | 2675.50 | 0.96 | < 0.001 | < 0.01 |

---

Supplementary Table 4. Multifunctionality and evenness indicators.

|                                          | <i>Dependent variable:</i>                |                          |
|------------------------------------------|-------------------------------------------|--------------------------|
|                                          | Multifunctionality<br>(Mean scaled score) | Evenness<br>(Pielou's J) |
| Contiguous                               | 0.017***<br>-0.003                        | 0.031***<br>-0.002       |
| Random                                   | 0.062***<br>-0.003                        | 0.009***<br>-0.002       |
| Low restoration                          | -0.030***<br>-0.003                       | 0.011***<br>-0.001       |
| No extensive grassland                   | -0.208***<br>-0.003                       | 0.024***<br>-0.001       |
| Contiguous : Low restoration             | -0.006<br>-0.004                          | -0.007***<br>-0.002      |
| Random : Low restoration                 | -0.012***<br>-0.004                       | 0.013***<br>-0.002       |
| Contiguous : No extensive grassland      | -0.012***<br>-0.004                       | -0.037***<br>-0.002      |
| Random : No extensive grassland          | -0.025***<br>-0.004                       | -0.020***<br>-0.002      |
| Low restoration : No extensive grassland | 0.022***<br>-0.003                        | -0.018***<br>-0.001      |
| Constant                                 | 0.601***                                  | 0.940***                 |
| Observations                             | 600                                       | 600                      |
| Log Likelihood                           | 1,408.139                                 | 1,875.134                |
| Akaike Inf. Crit.                        | -2,792.278                                | -3,726.269               |
| Bayesian Inf. Crit.                      | -2,739.515                                | -3,673.506               |
| <i>Note:</i>                             | *p<0.1; **p<0.05; ***p<0.01               |                          |

Supplementary Table 5. Linear mixed-effect regression models for the average multifunctionality present in each land cover type.

|                                | <i>Dependent variable:</i>   |                                            |                                            |                              |                                      |                                       |
|--------------------------------|------------------------------|--------------------------------------------|--------------------------------------------|------------------------------|--------------------------------------|---------------------------------------|
|                                | Crops<br>(mean scaled score) | Intensive grassland<br>(mean scaled score) | Extensive grassland<br>(mean scaled score) | Scrub<br>(mean scaled score) | Exotic forest<br>(mean scaled score) | Natural forest<br>(mean scaled score) |
| Contiguous                     | 0.019***<br>-0.001           | 0.001***<br>-0.0001                        | 0.001***<br>-0.0001                        | -0.002***<br>-0.0001         | -0.001***<br>-0.0001                 | -0.003***<br>-0.0001                  |
| Random                         | 0.076***<br>-0.001           | 0.005***<br>-0.0001                        | -0.002***<br>-0.0001                       | -0.002***<br>-0.0001         | 0.002***<br>-0.0001                  | -0.011***<br>-0.0001                  |
| No extensive grassland         | -0.001**<br>-0.001           | -0.0001<br>-0.0001                         | 0.004***<br>-0.0001                        | -0.003***<br>-0.0001         | -0.00003<br>-0.0001                  | 0.004***<br>-0.0001                   |
| Low restoration                | -0.002***<br>-0.001          | -0.0002***<br>-0.0001                      | 0.001***<br>-0.0001                        | 0.0001<br>-0.0001            | -0.0003***<br>-0.0001                | -0.007***<br>-0.0001                  |
| Contiguous : No extensive      | -0.004***<br>-0.001          | 0.0002**<br>-0.0001                        | 0.0002***<br>-0.0001                       | -0.00003<br>-0.0001          | 0.001***<br>-0.0001                  | 0.001***<br>-0.0002                   |
| Random : No extensive          | -0.016***<br>-0.001          | -0.001***<br>-0.0001                       | 0.002***<br>-0.0001                        | -0.001***<br>-0.0001         | -0.0003***<br>-0.0001                | 0.003***<br>-0.0002                   |
| Contiguous : Low restoration   | -0.006***<br>-0.001          | -0.0003***<br>-0.0001                      | -0.001***<br>-0.0001                       | 0.0005***<br>-0.0001         | 0.001***<br>-0.0001                  | -0.003***<br>-0.0002                  |
| Random : Low restoration       | -0.025***<br>-0.001          | -0.002***<br>-0.0001                       | 0.00005<br>-0.0001                         | 0.001***<br>-0.0001          | -0.001***<br>-0.0001                 | -0.002***<br>-0.0002                  |
| No extensive : Low restoration | 0.001<br>-0.001              | 0.00002<br>-0.0001                         | -0.002***<br>-0.0001                       | 0.001***<br>-0.0001          | -0.0001<br>-0.0001                   | 0.00005<br>-0.0001                    |
| Constant                       | 0.385***<br>-0.001           | 0.318***<br>-0.0001                        | 0.397***<br>-0.0001                        | 0.476***<br>-0.0001          | 0.762***<br>-0.0002                  | 0.698***<br>-0.0002                   |
| Observations                   | 600                          | 600                                        | 600                                        | 600                          | 600                                  | 600                                   |
| Log Likelihood                 | 2,416.876                    | 3,768.521                                  | 3,777.067                                  | 3,601.593                    | 3,420.364                            | 3,241.704                             |
| Akaike Inf. Crit.              | -4,809.751                   | -7,513.042                                 | -7,530.135                                 | -7,179.185                   | -6,816.729                           | -6,459.407                            |
| Bayesian Inf. Crit.            | -4,756.988                   | -7,460.279                                 | -7,477.372                                 | -7,126.422                   | -6,763.966                           | -6,406.644                            |

Note:

\*p<0.1; \*\*p<0.05; \*\*\*p<0.01
