# Supplementary material for: The Importance of Spatial Configuration When Restoring Intensive Production Landscapes for Biodiversity and Ecosystem Service Multifunctionality
Source: MDPI journal article supplement (doi:10.3390/land13040460), 2024-04-05
Supplement: s1 [file s1]

Archive with 1 entries (1 files):
- land-2952318-supplementary.pdf
